# Supplementary material for: Safety and Efficacy of Minimum- or Zero-Contrast IVUS–Guided Percutaneous Coronary Interventions in Chronic Kidney Disease Patients: A Systematic Review
Source: J Clin Med. 2021 May 6;10(9):1996. doi: 10.3390/jcm10091996 (PMC8125490; doi:10.3390/jcm10091996)
Supplement: Supplementary file 1 [file jcm-10-01996-s001.zip › Table S2.pdf]

**Table S4.** Quality assessment using Newcastle-Ottawa scale

|                                                                                                                                                                                                                                                                                                                                                                                                                        | <b>Sakai et al, 2018</b> |
|------------------------------------------------------------------------------------------------------------------------------------------------------------------------------------------------------------------------------------------------------------------------------------------------------------------------------------------------------------------------------------------------------------------------|--------------------------|
| <i>Selection:</i>                                                                                                                                                                                                                                                                                                                                                                                                      |                          |
| Representativeness of the exposed cohort                                                                                                                                                                                                                                                                                                                                                                               | *                        |
| Selection of the non-exposed cohort                                                                                                                                                                                                                                                                                                                                                                                    | *                        |
| Ascertainment of exposure                                                                                                                                                                                                                                                                                                                                                                                              | *                        |
| Demonstration that outcome of interest was not present at start of study                                                                                                                                                                                                                                                                                                                                               | *                        |
| <i>Comparability</i>                                                                                                                                                                                                                                                                                                                                                                                                   |                          |
| Comparability of cohorts on the basis of the design or analysis controlled for confounders                                                                                                                                                                                                                                                                                                                             |                          |
| <i>Outcome</i>                                                                                                                                                                                                                                                                                                                                                                                                         |                          |
| Assessment of outcome                                                                                                                                                                                                                                                                                                                                                                                                  | *                        |
| Was follow-up long enough for outcomes to occur?                                                                                                                                                                                                                                                                                                                                                                       | *                        |
| Adequacy of follow-up                                                                                                                                                                                                                                                                                                                                                                                                  |                          |
| <b>Total</b>                                                                                                                                                                                                                                                                                                                                                                                                           | <b>6 stars</b>           |
| <b>Good quality:</b> 3 or 4 stars in selection domain AND 1 or 2 stars in comparability domain AND 2 or 3 stars in outcome/exposure domain. <b>Fair quality:</b> 2 stars in selection domain AND 1 or 2 stars in comparability domain AND 2 or 3 stars in outcome/exposure domain. <b>Poor quality:</b> 0 or 1 star in selection domain OR 0 stars in comparability domain OR 0 or 1 stars in outcome/exposure domain. |                          |
